# Supplementary material for: A Comparative Study on Heavy Metal Removal from CCA-Treated Wood Waste by Yarrowia lipolytica: Effects of Metal Stress
Source: MDPI journal article supplement (doi:10.3390/jof9040469), 2023-04-13
Supplement: s1 [file s1]

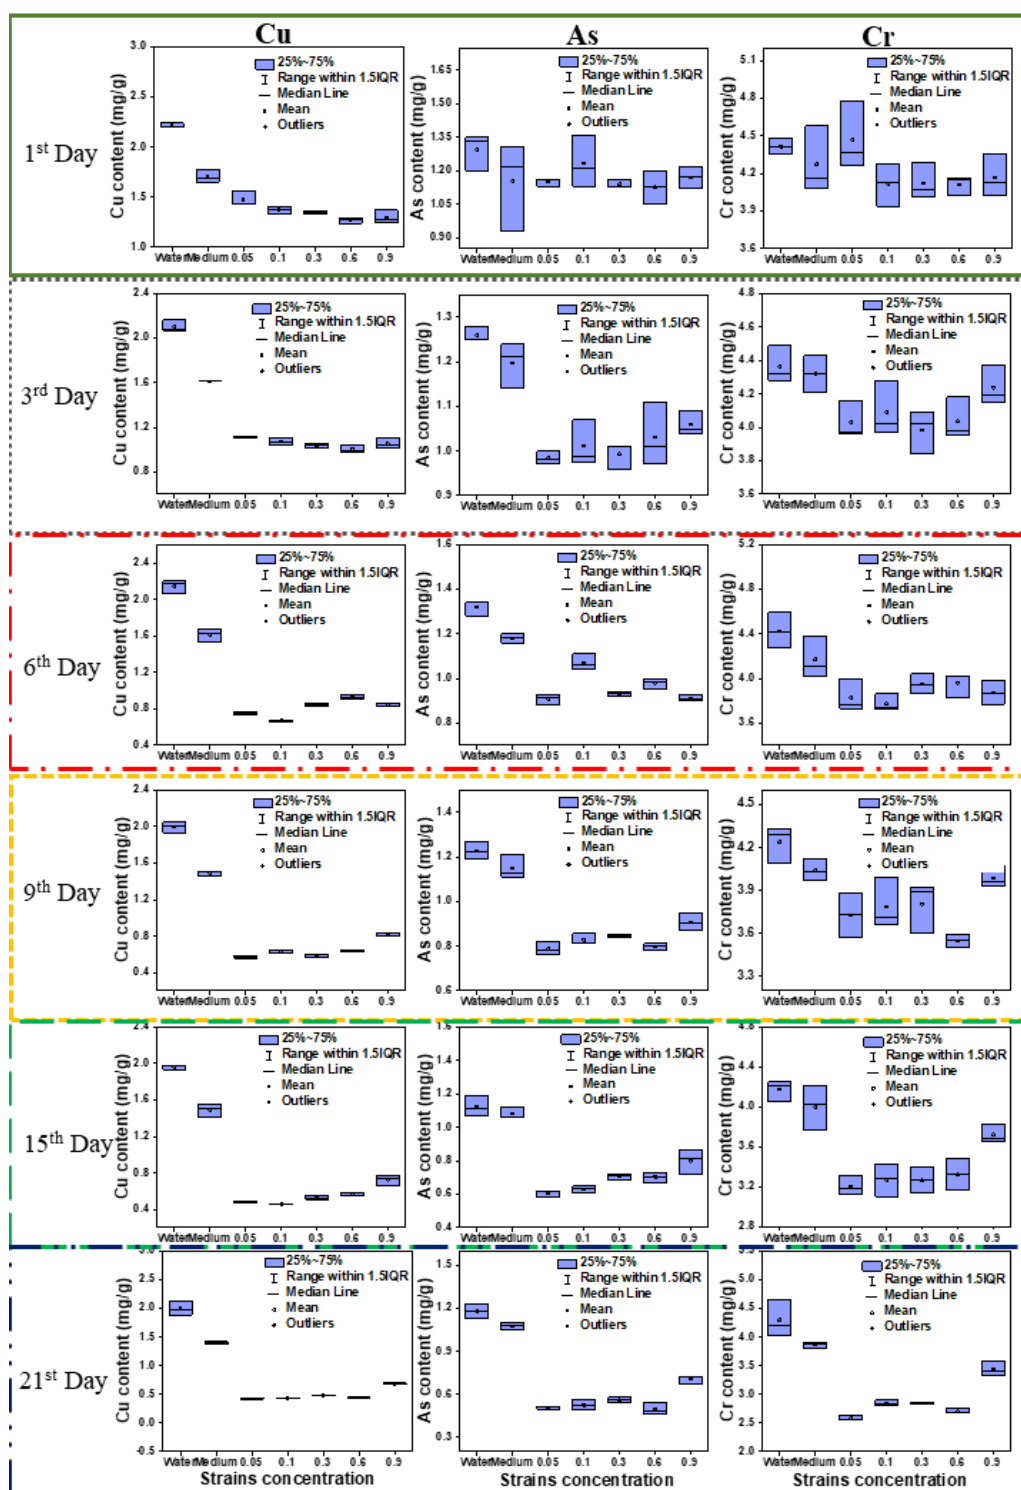

**Figure S1.** The content of copper, chromium and arsenic in wood, treated with different concentrations of yeast for different time.
